# Supplementary material
Source: Royal Society of Chemistry journal article supplement (doi:10.1039/d6tc01002d)
Supplement: d6tc01002d1.pdf [file d6tc01002d1.pdf]

## Supporting Information

# Achieving intrinsically stretchable high-performance n-type polymer semiconductors via flexible linker engineering

Tianhao Zhang,<sup>#,1</sup> Qian Che,<sup>#,2</sup> Zhihui Chen,<sup>2</sup> Weifeng Zhang,<sup>\*,2</sup> Liping Wang,<sup>\*,1</sup> and Gui Yu<sup>\*,2,3</sup>

<sup>1</sup> School of Materials Science and Engineering, University of Science and Technology Beijing, Beijing 100083, P. R. China

<sup>2</sup> Beijing National Laboratory for Molecular Sciences, Institute of Chemistry, Chinese Academy of Sciences, Beijing 100190, P. R. China

<sup>3</sup> School of Chemical Engineering and Technology, Tianjin University, Tianjin 300354, P. R. China

E-mail: lpwang@mater.ustb.edu.cn, zhangwf@iccas.ac.cn, yugui@iccas.ac.cn

<sup>#</sup>Authors T. H. Zhang and Q. Che contributed equally to this work.

## 1. General Measurements and Characterizations

<sup>1</sup>H nuclear magnetic resonance (NMR) and <sup>13</sup>C NMR spectra are tested on a Bruker AVANCE 400 HD machine, using proper deuterated reagents (e.g., DMSO-d<sub>6</sub>, CDCl<sub>3</sub>, CD<sub>2</sub>Cl<sub>2</sub>, etc.). High resolution mass spectra (HR-EI) were recorded on a Shimadzu QP 2010 gas chromatograph mass spectrometer, and high-resolution matrix assisted laser desorption/ionization time-of-flight mass spectra (HR-MALDI-TOF) were performed on a 9.4T Solarix FT-ICR mass spectrometer. Elemental analyses were carried out by

using a CARLO ERBA 1106 Elemental Analyser. The number-average molecular weight ( $M_n$ ), weight-average molecular weight ( $M_w$ ), and polydispersity index (PDI) of polymers were obtained by using an Agilent Technologies PL-GPC220 series Gel permeation chromatography (GPC) with 1,2,4-trichlorobenzene (TCB) as eluent at 150°C, and calibrated by narrow-polydispersity polystyrene standards. Thermogravimetric analyses (TGA) were conducted on a DTG-60 instrument under nitrogen flow, heating from 50 °C to 550 °C with a heating rate of 20°C min<sup>-1</sup>. The differential scanning calorimetry (DSC) tests were proceeded by DSC2-00881 (172.23.188.10) instrument, with circulation of 50 °C to 250 °C under heating/cooling rate of 10°C min<sup>-1</sup>. UV-vis absorption spectra were acquired by UH5700 Spectrophotometer. Cyclic voltammetric (CV) measurements were tested on a CHI660F electrochemistry workstation with a scan rate of 50 mV s<sup>-1</sup>. The atomic force microscope (AFM) images were acquired on a Digital Instruments Nanoscope V atomic force microscope, which operated in tapping mode. The 2D-GIXRD data were obtained by illuminating the thin film samples at a constant incidence angle of 0.2°.

## 2. Figures and Tables

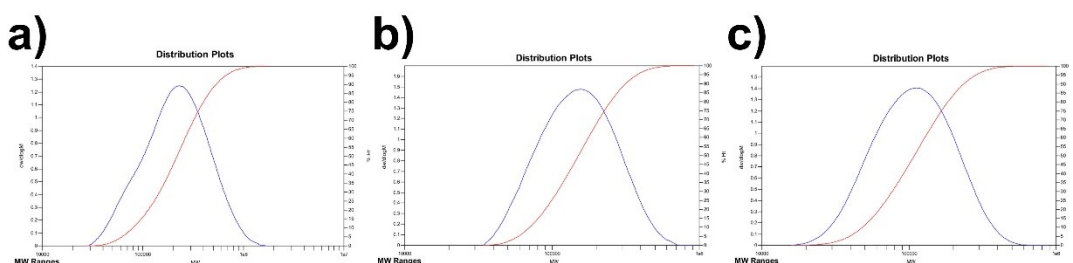

**Fig. S1.** GPC distribution plots of polymers a) **P0TVT**, b) **P1TVT** and c) **P2TVT**.

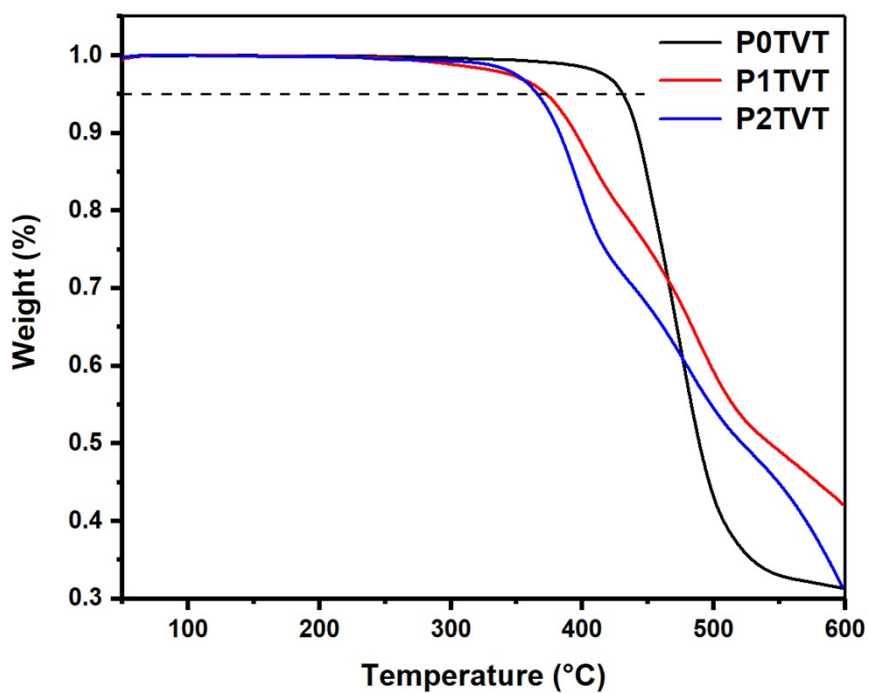

**Fig. S2.** TGA plots of polymers **P0TVT**, **P1TVT** and **P2TVT**.

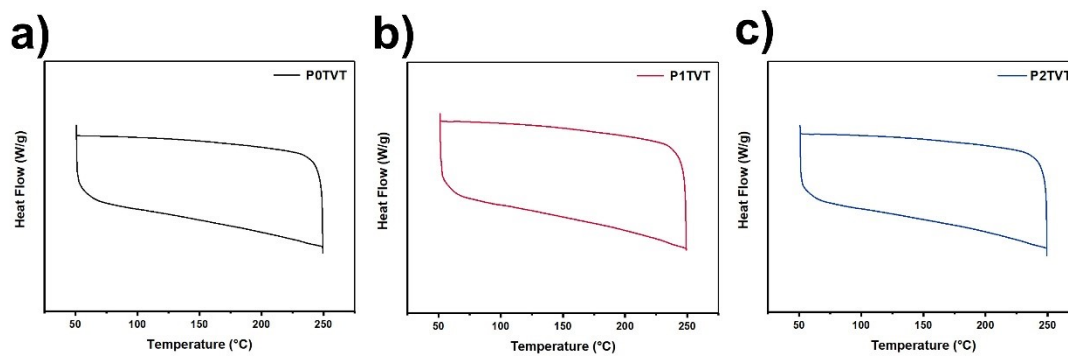

**Fig. S3.** DSC plots of the polymers a) **P0TVT**, b) **P1TVT** and c) **P2TVT**.

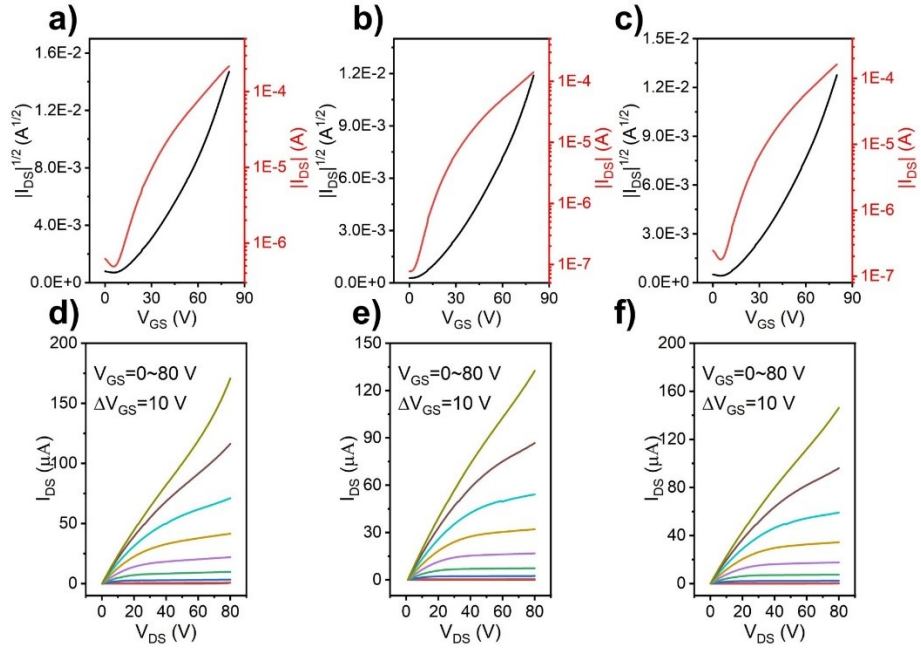

**Fig. S4.** Typical a-c) output and d-f) transfer curves of OFETs based on a, d) **P0TVT**, b, e) **P1TVT**, and c, f) **P2TVT** fabricated on PET substrates.

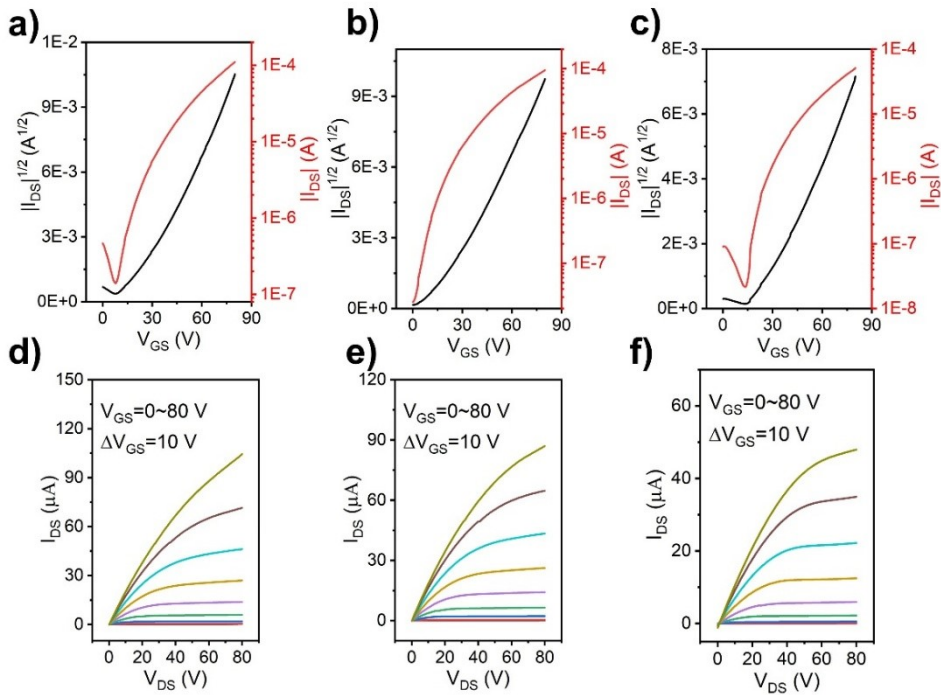

**Fig. S5.** Typical a-c) output and d-f) transfer curves of **P1TVT**-based stretchable OFETs under a, d) 0, b, e) 25% and c, f) 50% parallel strain.

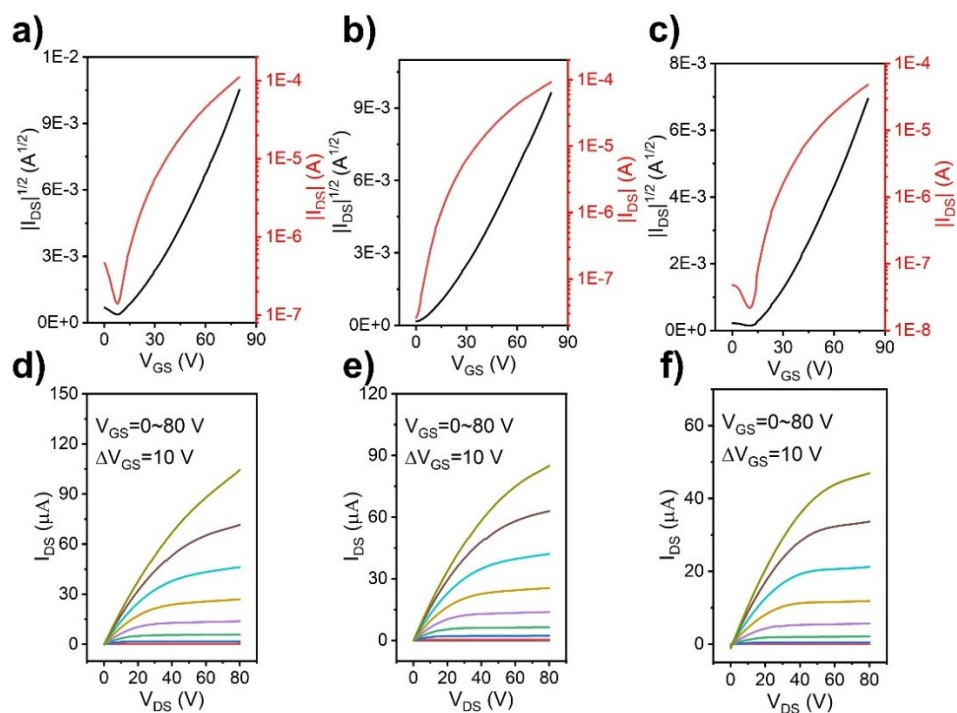

**Fig. S6.** Typical a-c) output and d-f) transfer curves of **P1TVT**-based stretchable OFETs under a, d) 0, b, e) 25% and c, f) 50% vertical strain.

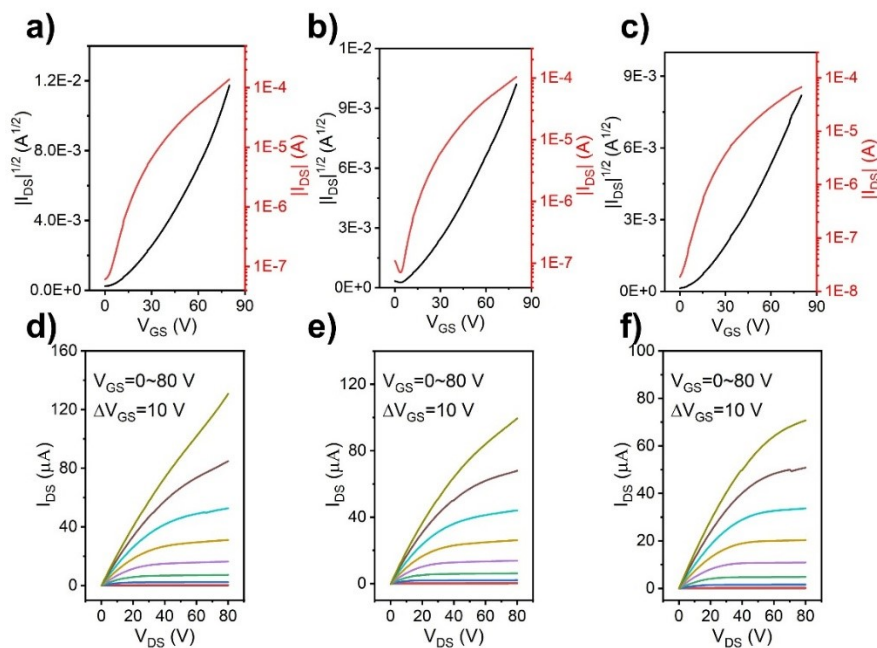

**Fig. S7.** Typical a-c) output and d-f) transfer curves of **P2TVT**-based stretchable OFETs under a, d) 0, b, e) 25% and c, f) 50% vertical strain.

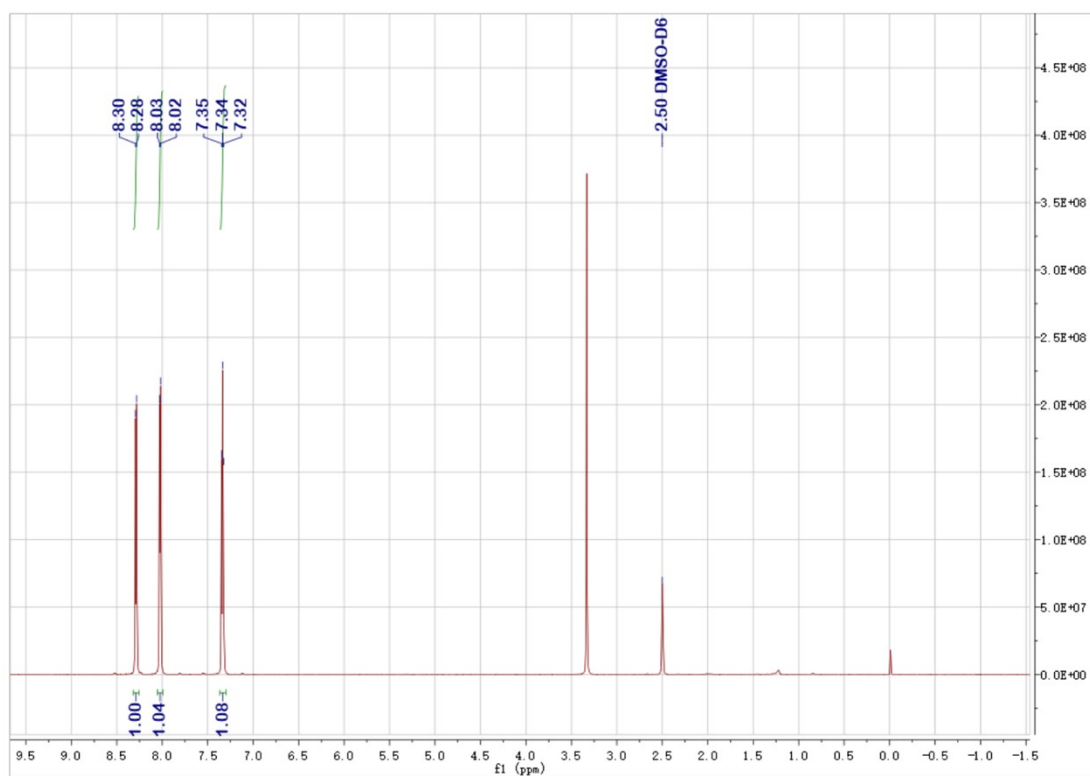

**Fig. S8.**  $^1\text{H}$  NMR data of compound 1,2-di(thiophen-2-yl) ethane-1,2-dione (3).

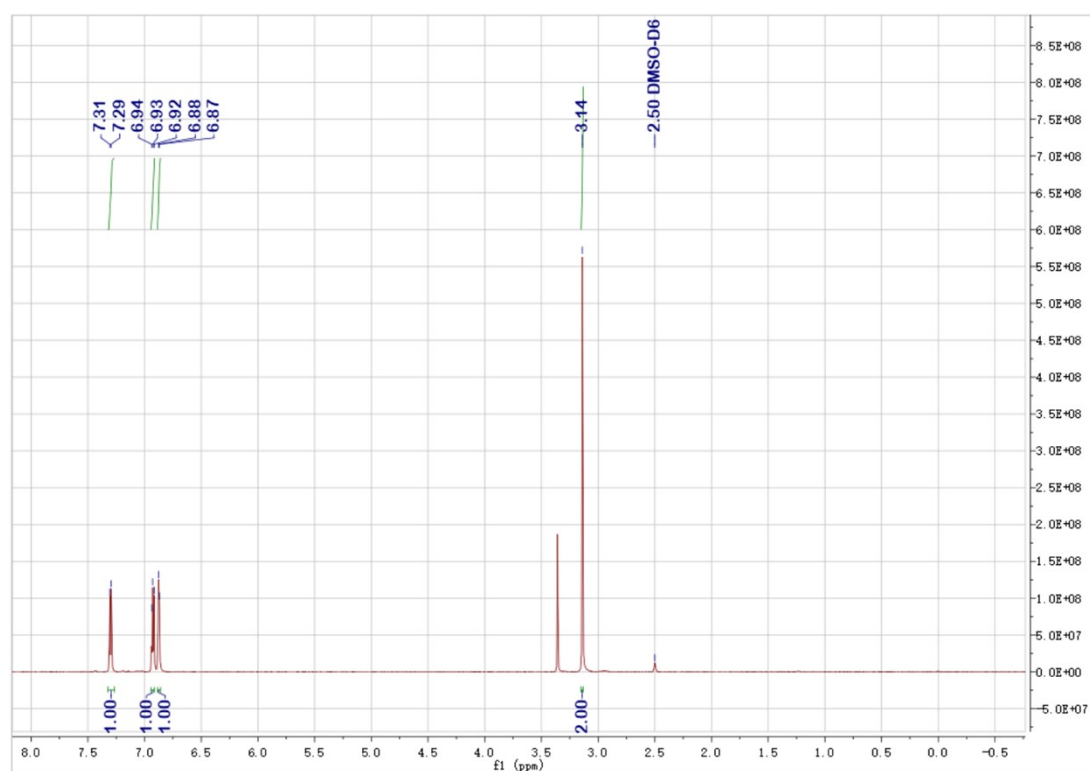

**Fig. S9.**  $^1\text{H}$  NMR data of compound 1,2-di(thiophen-2-yl) ethane (4).

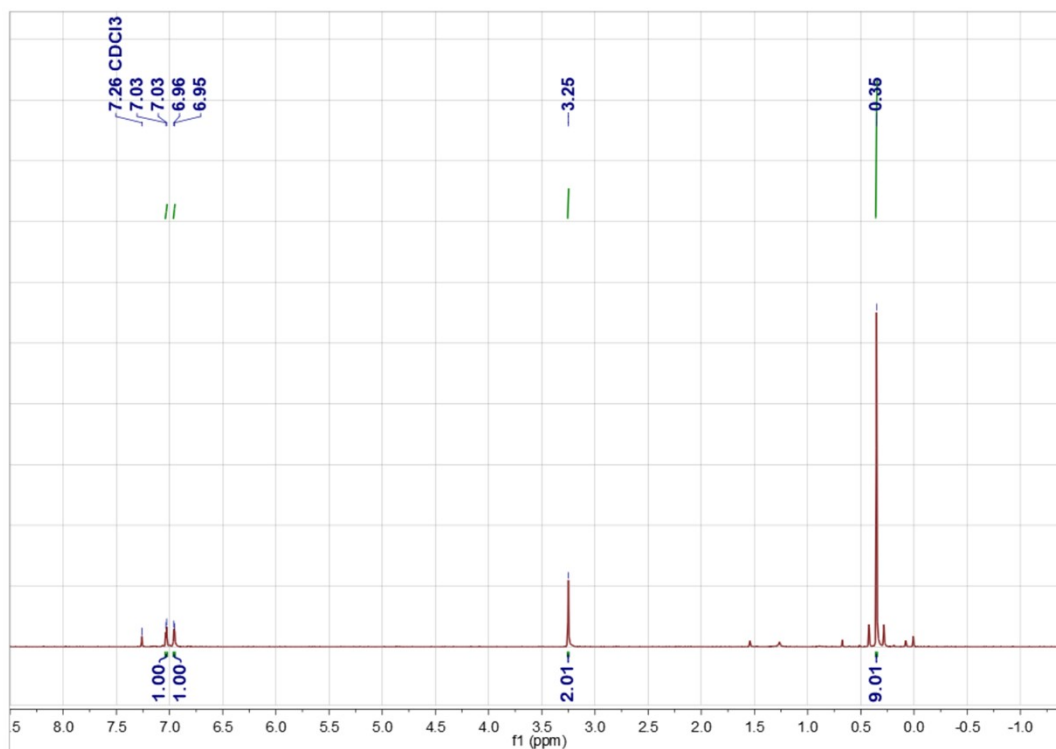

**Fig. S10.**  $^1\text{H}$  NMR data of compound 1,2-bis(5-(trimethylstannyl) thiophen-2-yl) ethane (5).

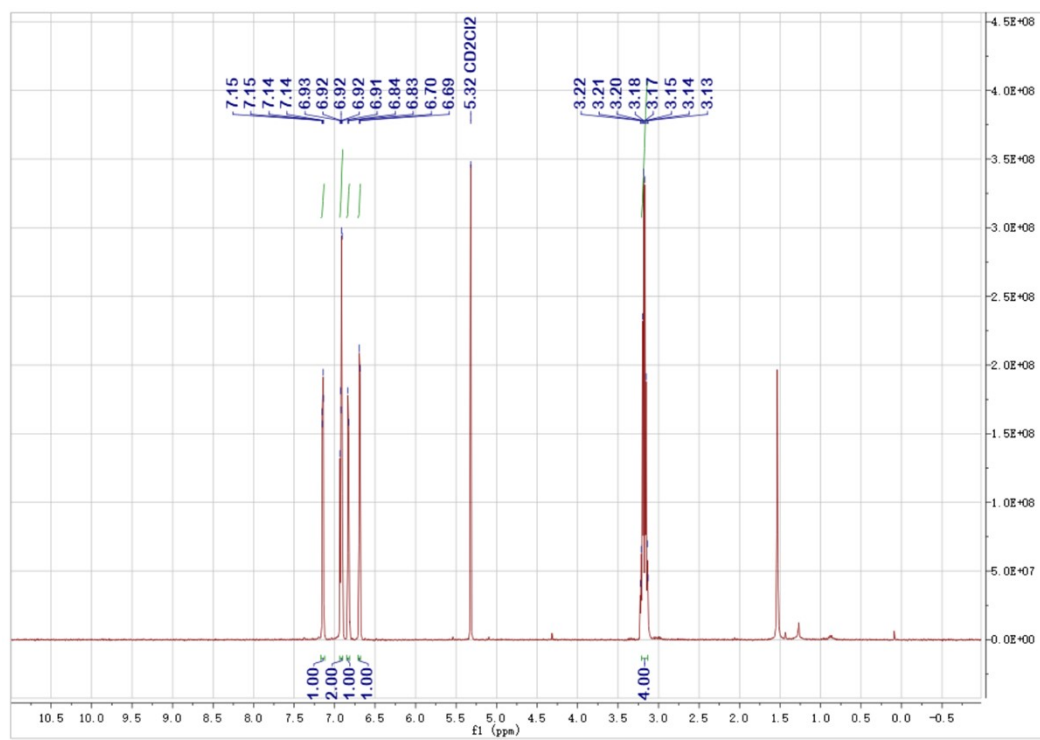

**Fig. S11.**  $^1\text{H}$  NMR data of compound 5,5'-bis(2-(thiophen-2-yl)ethyl)-2,2'-bithiophene (6).

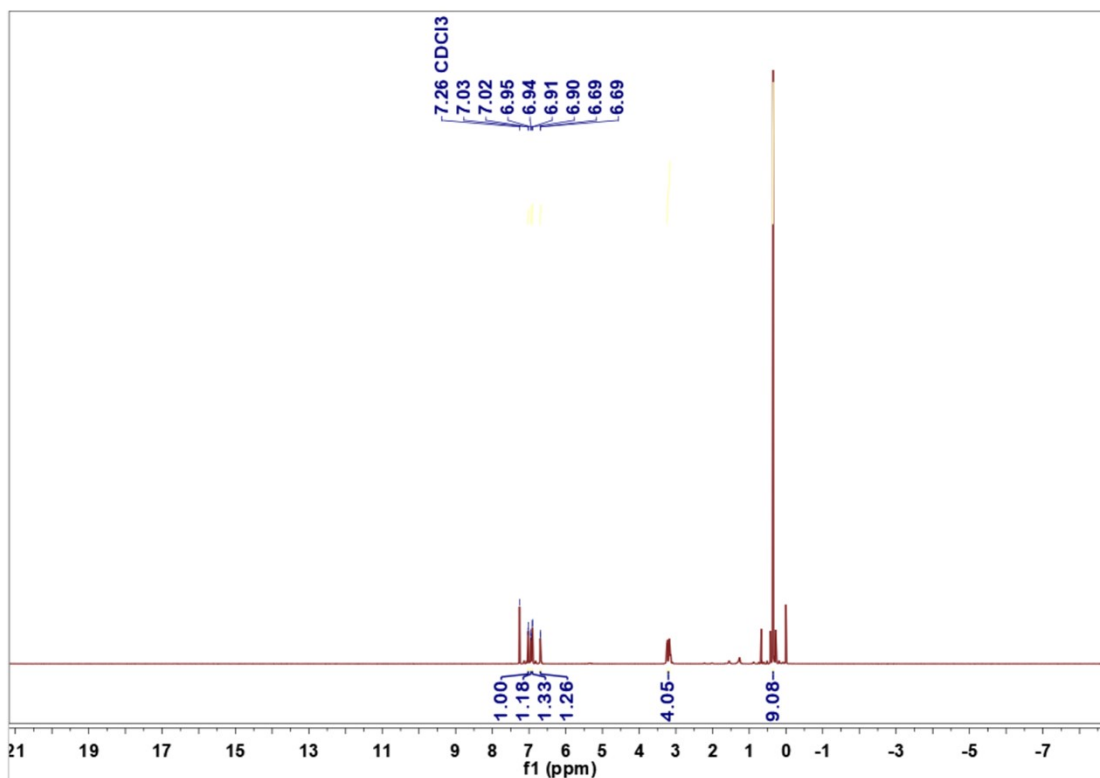

**Fig. S12.** <sup>1</sup>H NMR data of compound 5,5'-bis(2-(5-(trimethylstannyl) thiophen-2-yl) ethyl)-2,2'-bithiophene (7).

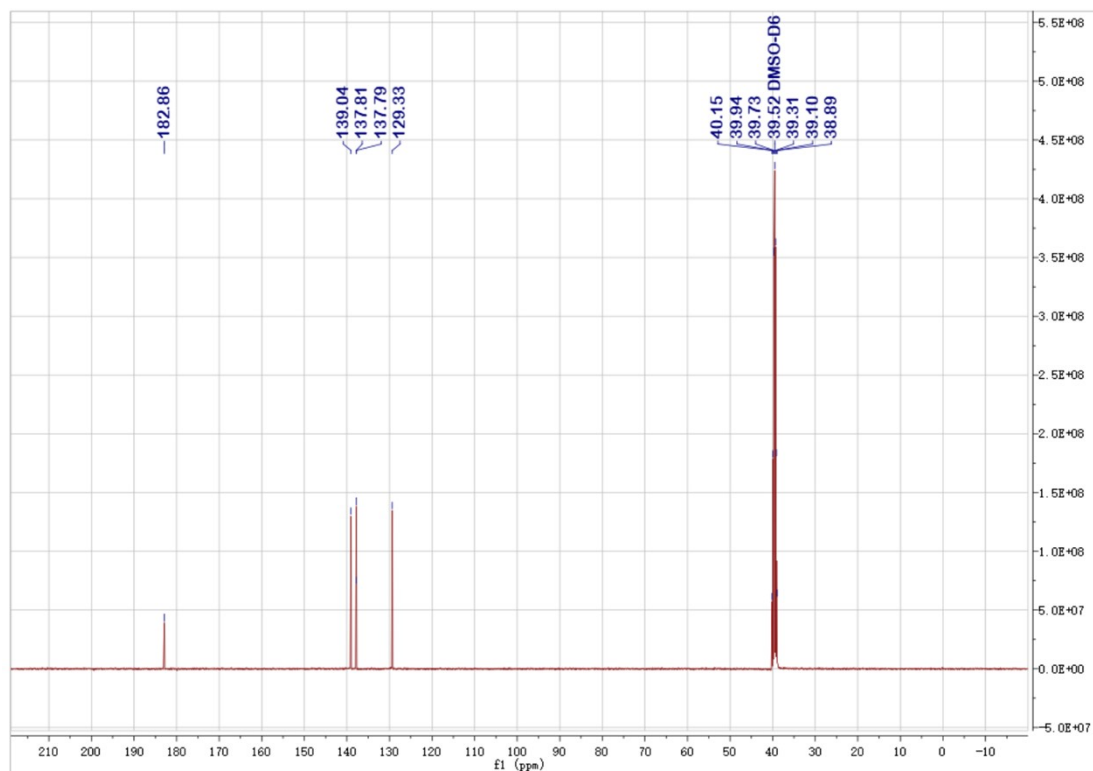

**Fig. S13.** <sup>13</sup>C NMR data of compound 3.

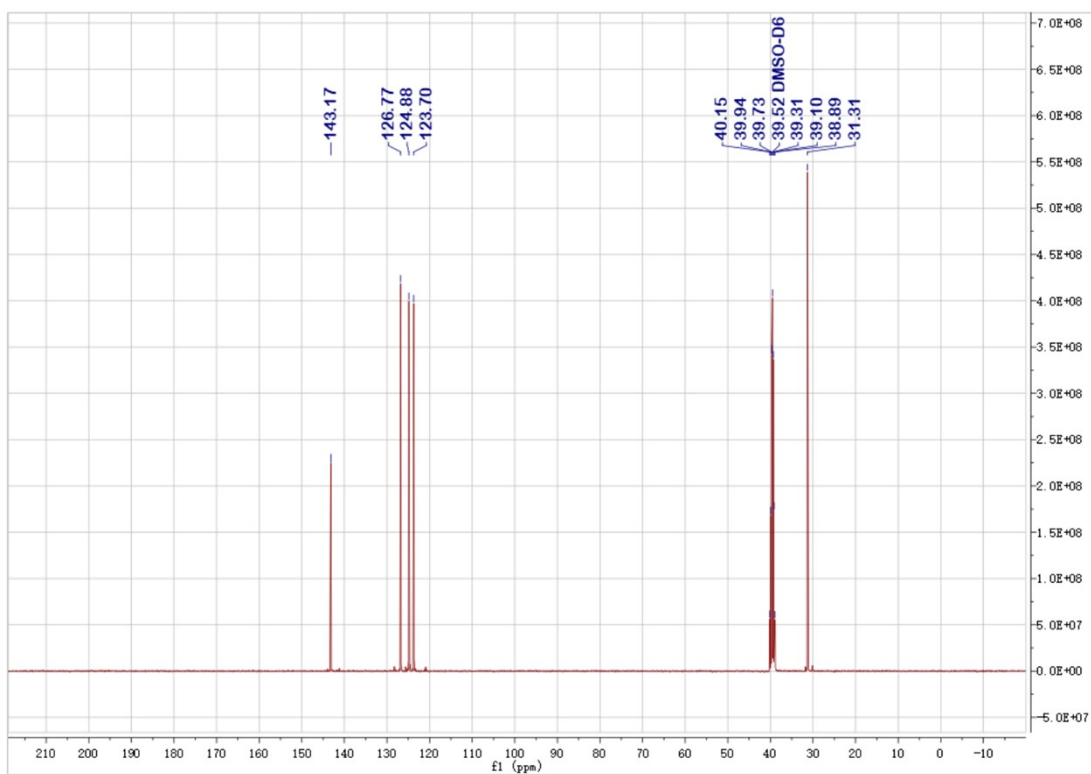

Fig. S14.  $^{13}\text{C}$  NMR data of compound 4.

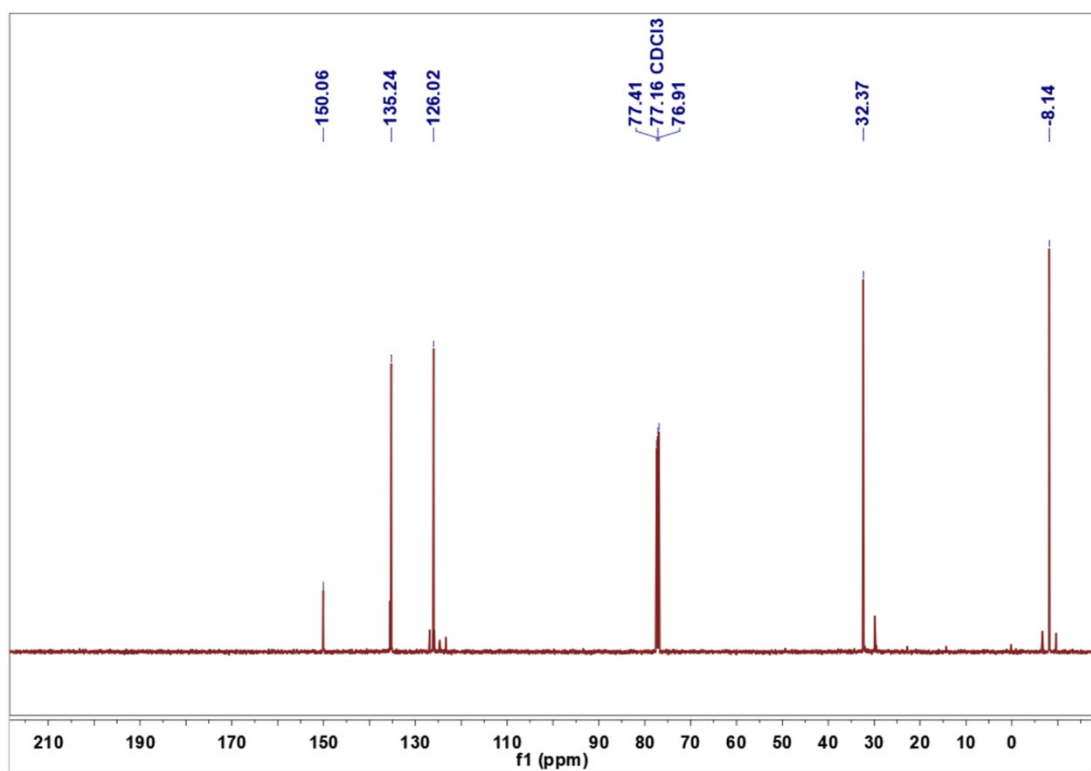

Fig. S15.  $^{13}\text{C}$  NMR data of compound 5.

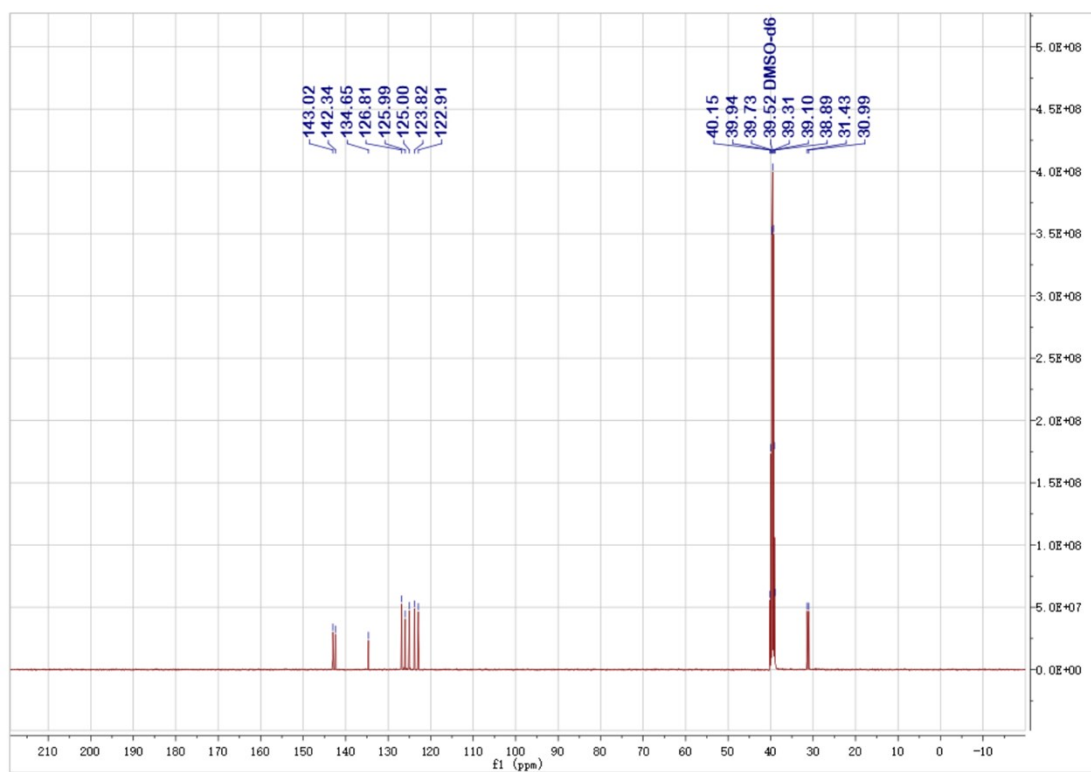

Fig. S16.  $^{13}\text{C}$  NMR data of compound 6.

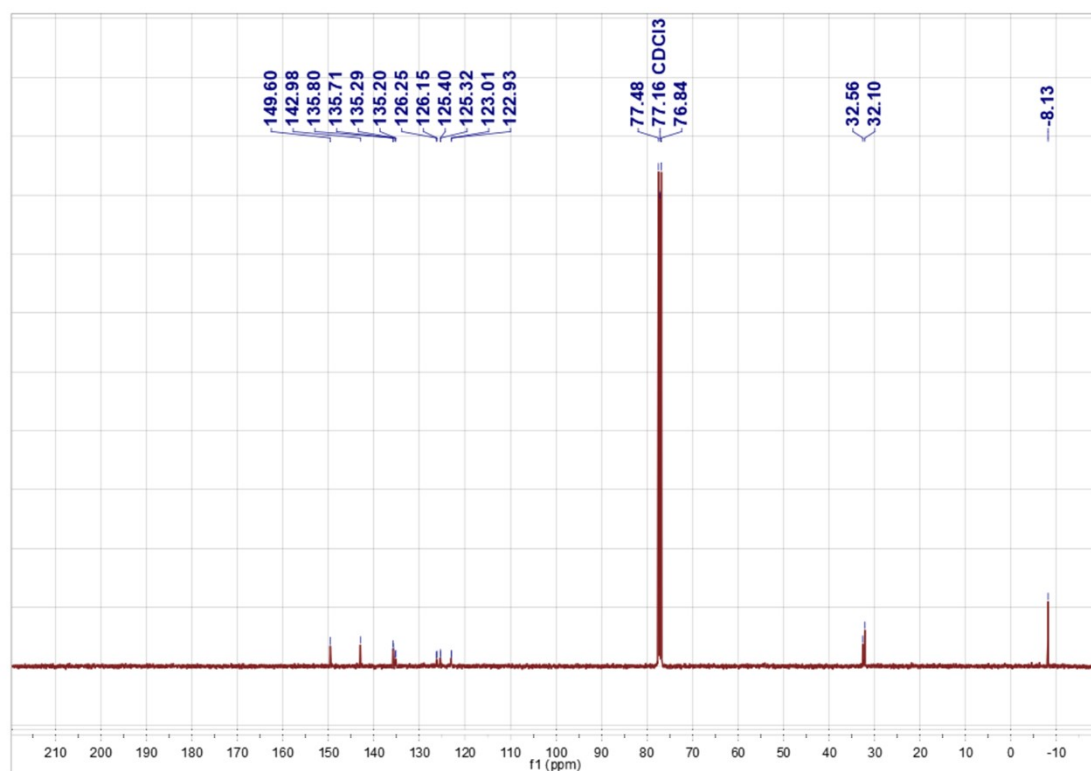

Fig. S17.  $^{13}\text{C}$  NMR data of compound 7.
